# Supplementary material
Source: Research Square preprint supplement (doi:10.21203/rs.3.rs-9514277/v1)
Supplement: Supplementary file 1 [file 0a9bcc56fbf4af420903bd6c.docx]

| **Treatment** | **Levene Test** | **Trial #** | **N** | **Mean Weight (g)** | **Std. Deviation** | **MIN** | **MAX** |
| --- | --- | --- | --- | --- | --- | --- | --- |
| **SHAM** | 0.981 | 1 | 13 | 2.92 | 0.4 | 2.4 | 3.6 |
| 2 | 13 | 2.92 | 0.38 | 2.2 | 3.6 |
| 3 | 13 | 2.96 | 0.39 | 2.1 | 3.5 |
| 4 | 13 | 2.89 | 0.38 | 2.2 | 3.5 |
| 5 | 12 | 2.98 | 0.34 | 2.5 | 3.6 |
| 6 | 10 | 3.03 | 0.33 | 2.6 | 3.6 |
| 7 | 7 | 2.99 | 0.42 | 2.5 | 3.8 |
| 8 | 1 | 3.6 | — | 3.6 | 3.6 |
| **CBD** | 0.596 | 1 | 13 | 2.46 | 0.3 | 1.8 | 3 |
| 2 | 13 | 2.52 | 0.38 | 2 | 3.3 |
| 3 | 13 | 2.52 | 0.24 | 2.1 | 2.9 |
| 4 | 13 | 2.58 | 0.24 | 2.1 | 3 |
| 5 | 13 | 2.47 | 0.22 | 2.1 | 2.8 |
| 6 | 12 | 2.58 | 0.25 | 2.1 | 3 |
| 7 | 9 | 2.53 | 0.23 | 2.2 | 2.8 |
| 8 | 7 | 2.57 | 0.14 | 2.4 | 2.8 |
| 9 | 5 | 2.6 | 0.29 | 2.4 | 3.1 |
| 10 | 2 | 2.4 | 0.42 | 2.1 | 2.7 |
| **THC** | 0.994 | 1 | 8 | 2.44 | 0.36 | 2 | 3 |
| 2 | 8 | 2.46 | 0.39 | 2 | 3.2 |
| 3 | 8 | 2.41 | 0.38 | 1.8 | 3.1 |
| 4 | 8 | 2.41 | 0.36 | 1.8 | 2.9 |
| 5 | 8 | 2.34 | 0.35 | 1.9 | 2.9 |
| 6 | 6 | 2.5 | 0.34 | 2.1 | 3 |
| 7 | 6 | 2.63 | 0.33 | 2.2 | 3.1 |
| 8 | 6 | 2.38 | 0.29 | 1.9 | 2.7 |
| 9 | 4 | 2.33 | 0.33 | 2.1 | 2.8 |
| 10 | 2 | 2.3 | 0.14 | 2.2 | 2.4 |

**Supplementary Table 1:** **The random selection of pup order for the PRT task is not biased by body weight.** Levene's test indicated no significant differences in weight variability based on the order in which pups from the same litter were tested. The table summarizes pup weight statistics for each treatment group, organized by testing order. Reported values include treatment group, Levene's test p-value, testing order, number of pups (n), mean pup weight (g), standard deviation (std deviation), and minimum (MIN) and maximum (MAX) pup weights.
